# Supplementary material
Source: PubMed Central journal article supplement (PMC3114597)
Supplement: supp_jlb.1010579_5A1010-579_Yu_supple_figs_1-4.pdf [file supp_jlb.1010579_5A1010-579_Yu_supple_figs_1-4.pdf]

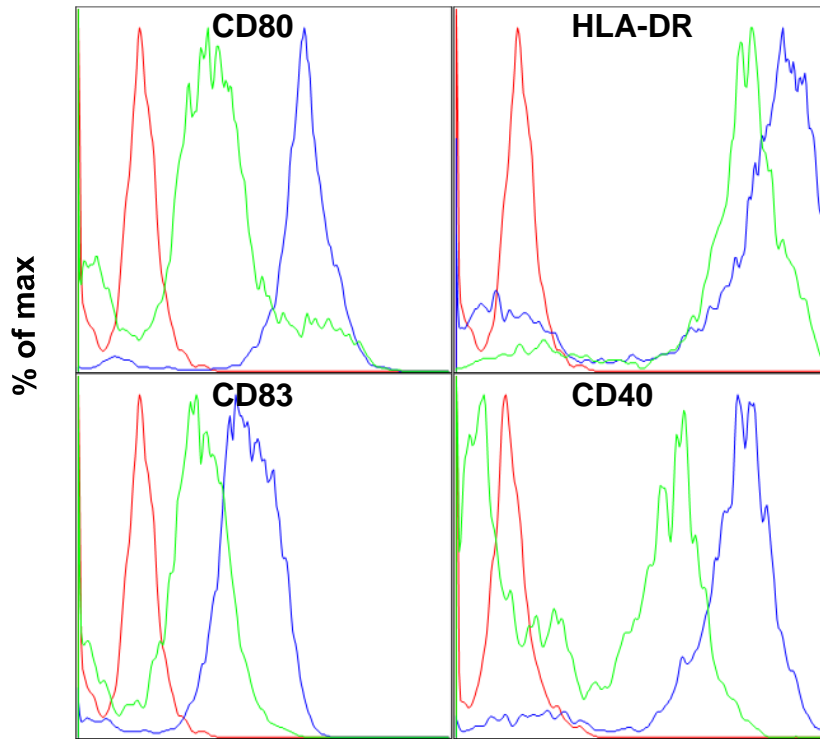

### Supplemental Figure 1

Up-regulated expression of surface markers CD80, CD83, CD40, and HLA-DR on mature MDDCs (blue curves) stimulated with LPS and IFN-g was observed by flow cytometry as compared with immature MDDCs (green curves). Red curves represent the isotype controls.

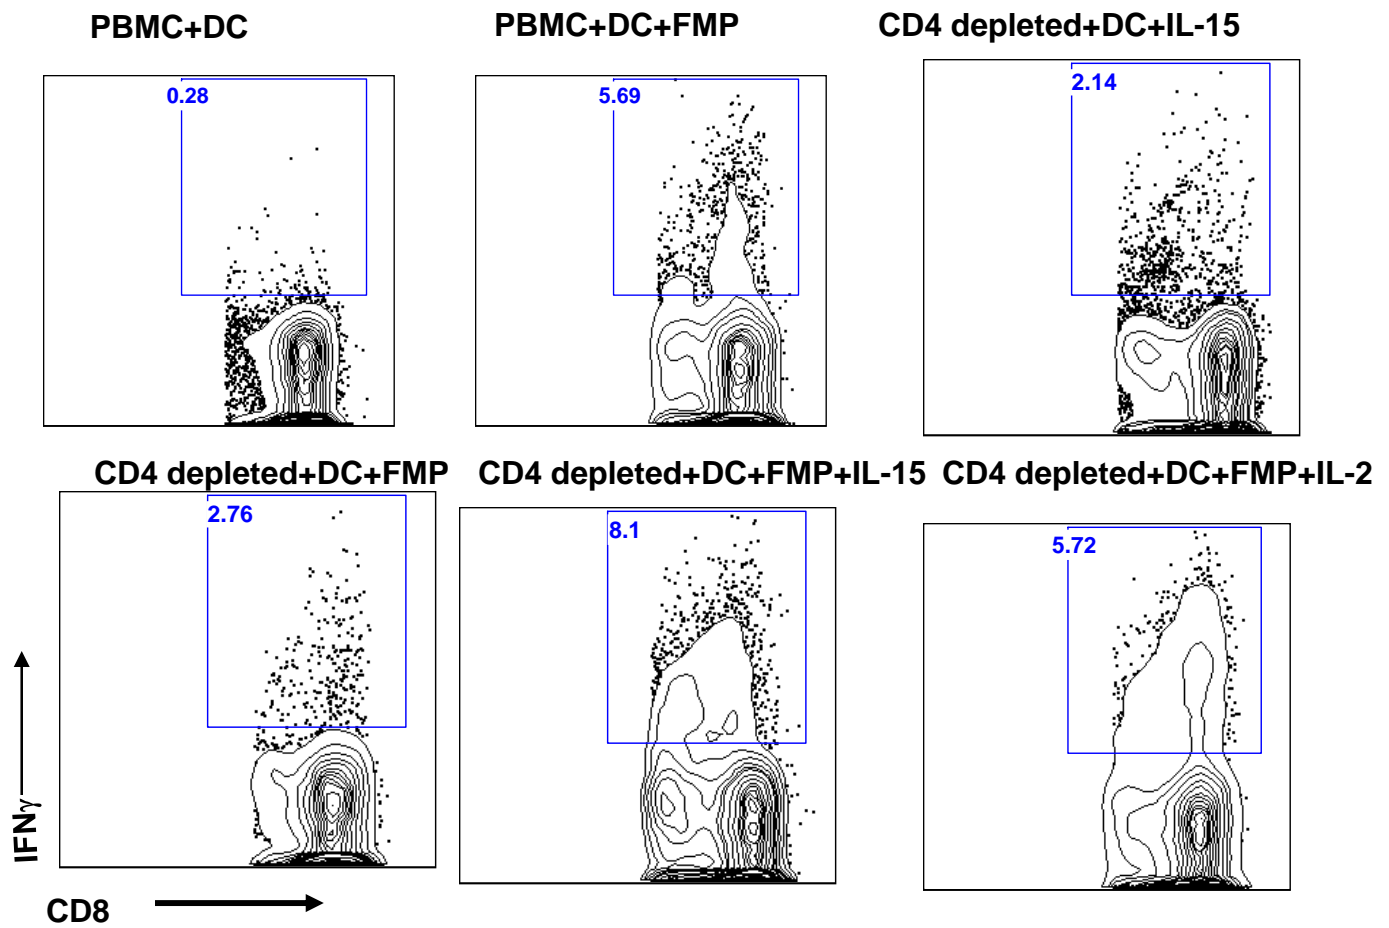

### Supplemental Figure 2

IL-2 and IL-15 substitution for CD4<sup>+</sup> T cell help in recall CD8<sup>+</sup> T cell responses.  
 A representative plot was shown from one donor.

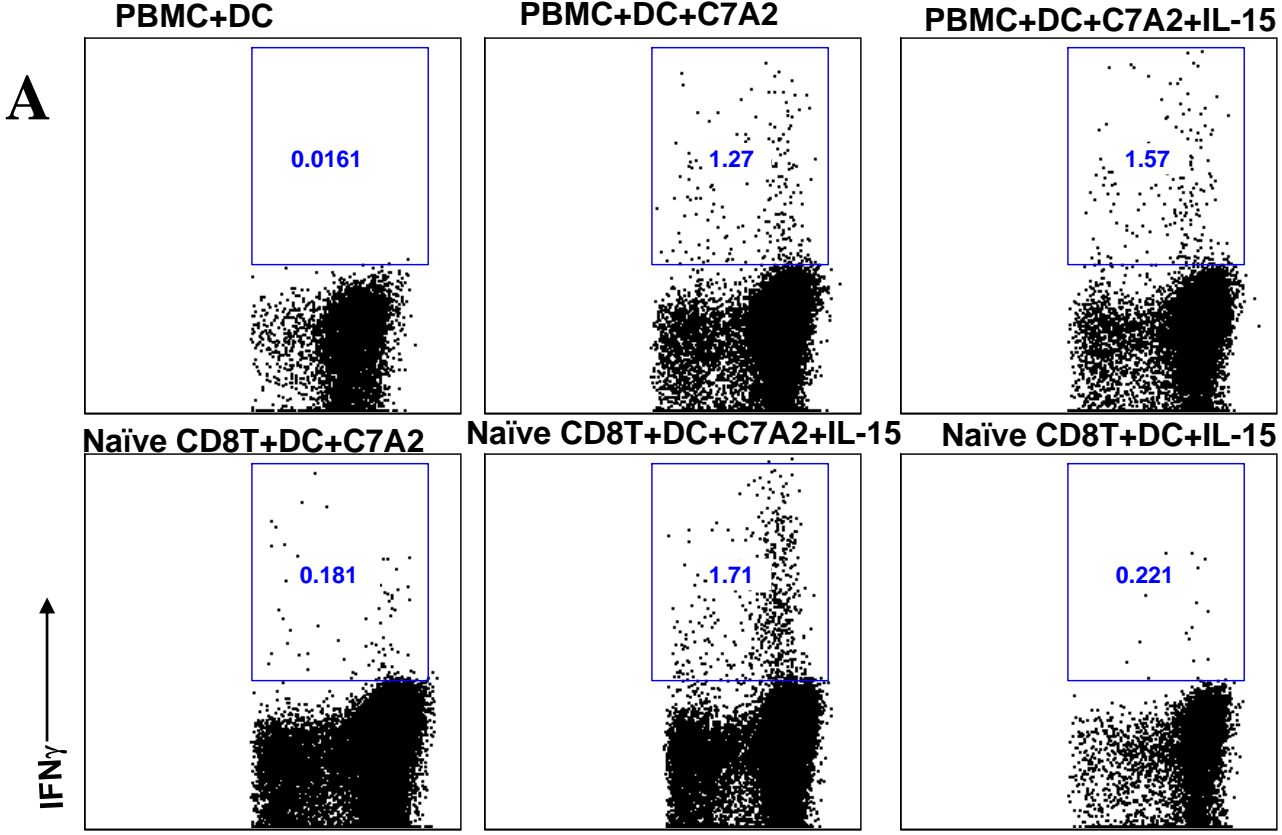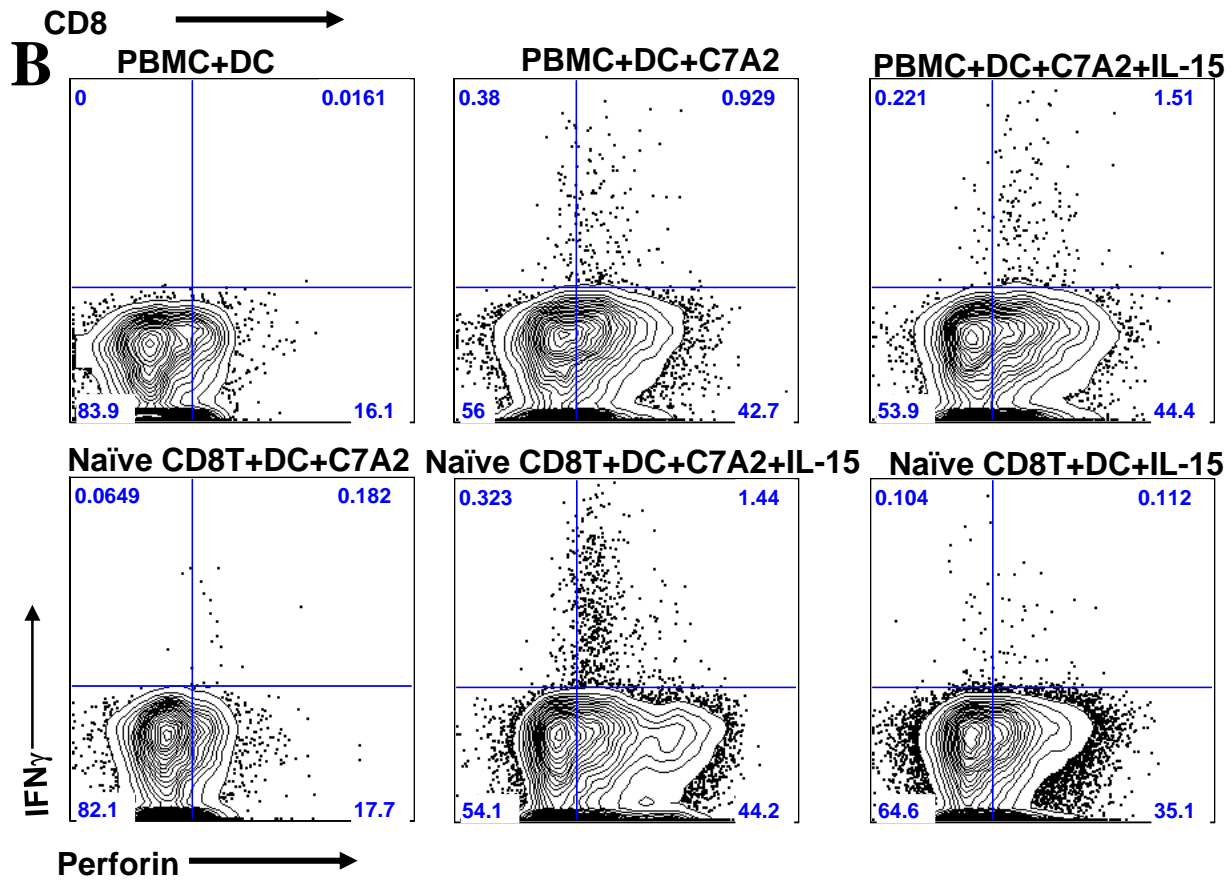

**Supplemental Figure 3**

IL-15 substitution for CD4<sup>+</sup> T cell help in primary CD8<sup>+</sup> T cell responses. For the primary responses, the purified naïve CD8<sup>+</sup> T cells were used to rule out cross-reactive memory T cells.

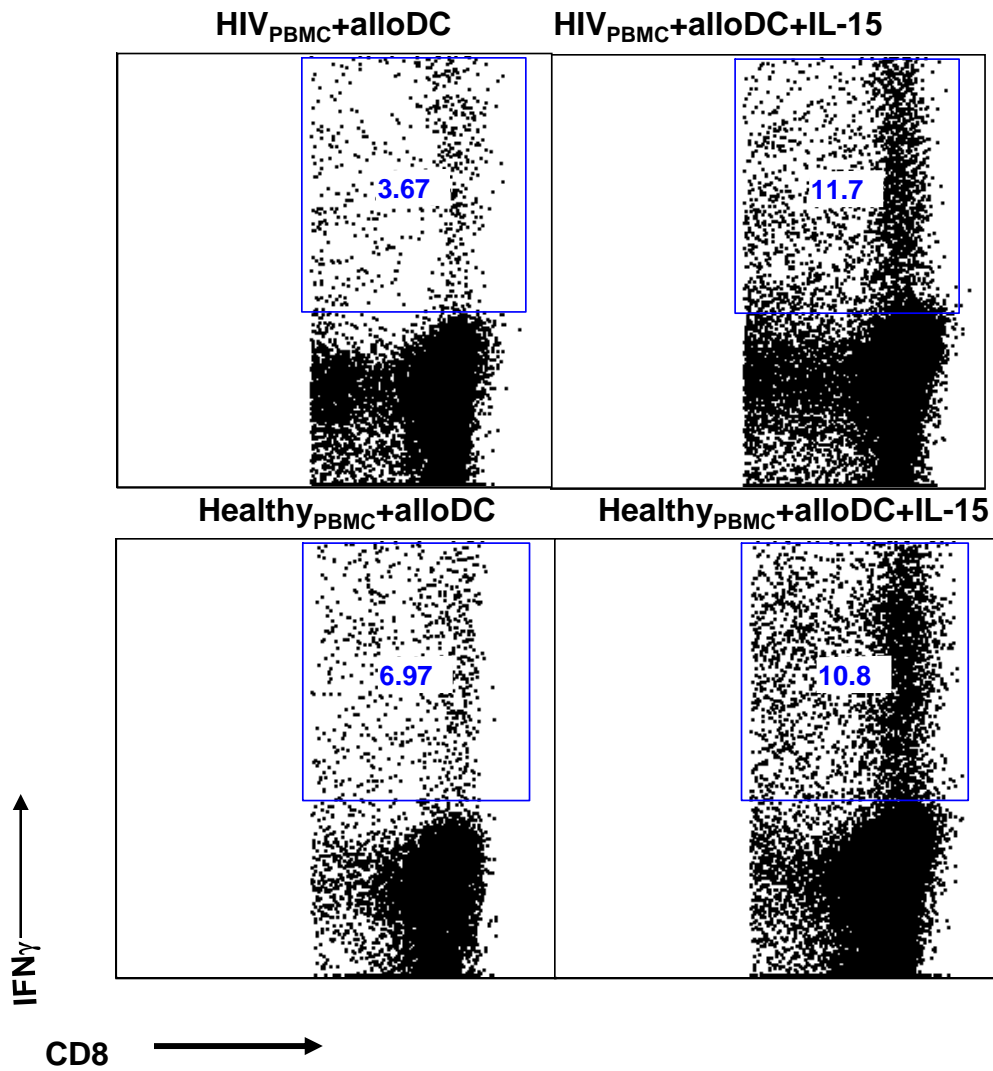

#### Supplemental Figure 4

The CD8<sup>+</sup> T cell responses of HIV-1 infected patient and healthy donor to allogeneic DCs .  
A representative plot was shown from one HIV donor and one healthy donor.
